# Supplementary material for: BNT162b2 vaccine-induced humoral and cellular responses against SARS-CoV-2 variants in Systemic Lupus Erythematosus
Source: bioRxiv or medRxiv preprint supplement (doi:10.1101/2021.07.07.21260124), 2021-07-08
Supplement: Supplementary file [file media-1.pdf]

## SUPPLEMENTARY MATERIAL

**Table S1: Local and systemic adverse events reported at days 14, 28 and 45 after first BNT162b2 dose in 126 SLE patients**

| <b>Adverse event</b>   | <b>Day 14</b> | <b>Day 28</b> | <b>Day 42</b> |
|------------------------|---------------|---------------|---------------|
| Any adverse event      | 97 (77.0%)    | 46 (36.5%)    | 70 (56.5%)    |
| Pain at injection site | 85 (67.5%)    | 17 (13.5%)    | 49 (39.5%)    |
| Fatigue                | 50 (39.7%)    | 26 (20.6%)    | 44 (35.5%)    |
| Headache               | 32 (25.4%)    | 22 (17.5%)    | 23 (18.5%)    |
| Fever                  | 10 (7.9%)     | 3 (2.4%)      | 7 (5.6%)      |
| Local redness          | 5 (4.0%)      | 1 (0.8%)      | 2 (1.6%)      |
| Vomiting               | 8 (6.3%)      | 6 (4.8%)      | 6 (4.8%)      |
| Diarrhea               | 13 (10.3%)    | 11 (8.7%)     | 9 (7.3%)      |
| Muscle pain            | 19 (15.1%)    | 11 (8.7%)     | 17 (13.7%)    |
| Joint pain             | 22 (17.5%)    | 11 (8.7%)     | 17 (13.7%)    |
| Insomnia               | 17 (13.5%)    | 11 (8.7%)     | 10 (8.1%)     |

Variables are presented as n (%)

**Table S2. Baseline predictors of day 42 anti-SARS-CoV-2 RBD IgG titers according to linear regression model.** SLE activity is measured with SLEDAI.

|                          | $\beta$ | 95% CI      | p-value |
|--------------------------|---------|-------------|---------|
| Age, years               | -0.47   | -1.8, 0.88  | 0.5     |
| Male sex                 | -55     | -121, 10    | 0.10    |
| SLEDAI 2K >4 on day 1    | -19     | -81, 42     | 0.5     |
| C3, g/L                  | 43      | -70, 156    | 0.4     |
| dsDNA antibodies, IU/mL  | 0.04    | -0.05, 0.14 | 0.4     |
| IFN                      | -2.9    | -6.9, 1.1   | 0.2     |
| IgA, g/L                 | 0.62    | -14, 15     | >0.9    |
| IgG, g/L                 | 2.0     | 0.35, 3.6   | 0.018   |
| IgM, g/L                 | 12      | -0.66, 25   | 0.063   |
| Lymphocytes, day 1 (G/L) | 9.0     | -29, 47     | 0.6     |
| Corticosteroids low      | -18     | -64, 28     | 0.4     |
| Corticosteroids high     | -51     | -130, 28    | 0.2     |
| Hydroxychloroquine       | -22     | -80, 36     | 0.5     |
| Azathioprine             | -128    | -256, -0.22 | 0.050   |
| Belimumab                | -15     | -89, 58     | 0.7     |
| Mycophenolate mofetil    | -77     | -154        | 0.008   |
| Other immunosuppressor   | 63      | -32, 157    | 0.2     |
| Methotrexate             | -120    | -241        | <0.001  |

$\beta$ : see Material and methods; CI = Confidence Interval; dsDNA: double stranded DNA; IFN: Interferon; RBD: Receptor Binding Domain; SLEDAI: SLE Disease Activity Index

**Table S3. Baseline B cell predictors of serum neutralizing activity at day 42 according to linear regression model**

|                                   | $\beta$ | 95% CI      | p-value |
|-----------------------------------|---------|-------------|---------|
| Age, years                        | -0.01   | -0.02, 0.01 | 0.6     |
| Male sex                          | -0.76   | -1.7, 0.15  | 0.10    |
| At least one BILAG score $\geq$ B | -1.2    | -2.1, -0.27 | 0.011   |
| C3, g/L                           | 0.81    | -0.71, 2.3  | 0.3     |
| dsDNA antibodies, IU/mL           | 0.00    | 0.00, 0.00  | 0.7     |
| Detectable IFN alpha              | -0.06   | -0.11, 0.00 | 0.046   |
| Total serum IgA, g/L              | -0.02   | -0.22, 0.17 | 0.8     |
| Total serum IgG, g/L              | 0.01    | -0.01, 0.04 | 0.3     |
| Total serum IgM, g/L              | 0.05    | -0.12, 0.23 | 0.5     |
| Corticosteroids $\leq$ 10mg/day   | -0.04   | -0.67, 0.59 | >0.9    |
| Corticosteroids >10mg/day         | -0.07   | -1.1, 1.0   | >0.9    |
| Hydroxychloroquine                | -0.01   | -0.83, 0.80 | >0.9    |
| Azathioprine                      | -1.4    | -3.2, 0.30  | 0.10    |
| Belimumab                         | 0.26    | -0.75, 1.3  | 0.6     |
| Mycophenolate mofetil             | -1.1    | -1.9, -0.34 | 0.005   |
| Methotrexate                      | -1.9    | -2.7, -1.0  | <0.001  |
| Other immunosuppressor            | 0.26    | -1.0, 1.6   | 0.7     |

$\beta$ : see Material and methods; BILAG: British Isles Lupus Assessment Group; CI = Confidence Interval; dsDNA: double stranded DNA; IFN: Interferon;

**Table S4: Results of linear regression model for baseline B cell subpopulations and serum neutralizing activity at day 42**

|                                          | $\beta^*$ | 95% CI      | p-value |
|------------------------------------------|-----------|-------------|---------|
| Corticosteroids $\leq 10$ mg/day         | -0.18     | -0.79, 0.43 | 0.6     |
| Corticosteroids $> 10$ mg/day            | -1.0      | -2.1, 0.19  | 0.10    |
| Hydroxychloroquine                       | 0.05      | -0.90, 1.0  | $> 0.9$ |
| Azathioprine                             | -0.85     | -2.8, 1.1   | 0.4     |
| Belimumab                                | 0.30      | -1.1, 1.7   | 0.7     |
| Mycophenolate mofetil                    | -1.6      | -2.6, -0.69 | 0.001   |
| Methotrexate                             | -1.4      | -2.4, -0.39 | 0.007   |
| Other immunosuppressor                   | 1.3       | -1.1, 3.7   | 0.3     |
| Marginal zone B lymphocytes, Day 1 (%)   | -0.01     | -0.04, 0.02 | 0.5     |
| Autoreactive B lymphocytes, Day 1 (%)    | -0.01     | -0.04, 0.03 | 0.7     |
| Naïve B lymphocytes, Day 1 (%)           | 0.04      | 0.01, 0.07  | 0.006   |
| Double negative B lymphocytes, Day 1 (%) | -0.01     | -0.08, 0.07 | 0.9     |
| Memory B lymphocytes, Day 1 (%)          | -0.02     | -0.04, 0.00 | 0.10    |

$\beta$ : see Material and methods; CI = Confidence Interval; \*Log (D614G); Autoreactive B cells (CD21<sup>low</sup>CD38<sup>low</sup>); Double Negative B cells (CD27-IgD<sup>-</sup>); Marginal Zone B cells (CD27+IgD<sup>+</sup>); Memory B cells (CD27+IgD<sup>-</sup>); Naïve B cells (CD27-IgD<sup>+</sup>). B cell subsets frequencies are measured in total B cells.

**Figure S1: Analysis of peripheral B cell subsets phenotyping**

Representative flow cytometry gating strategy for CD27+IgD- memory B cells (A), CD27+IgD+ Marginal Zone B cells (B), CD27-IgD- Double Negative B cells (C), CD27-IgD+ Naïve B cells (D), CD21<sup>low</sup>CD38<sup>low</sup> B cells (E)

**Figure S2: Local and systemic reactions reported throughout the vaccination schedule.**
