# Supplementary material for: BNT162b2 vaccine-induced humoral and cellular responses against SARS-CoV-2 variants in Systemic Lupus Erythematosus
Source: bioRxiv or medRxiv preprint supplement (doi:10.1101/2021.07.07.21260124), 2021-07-08

**Figure S2**

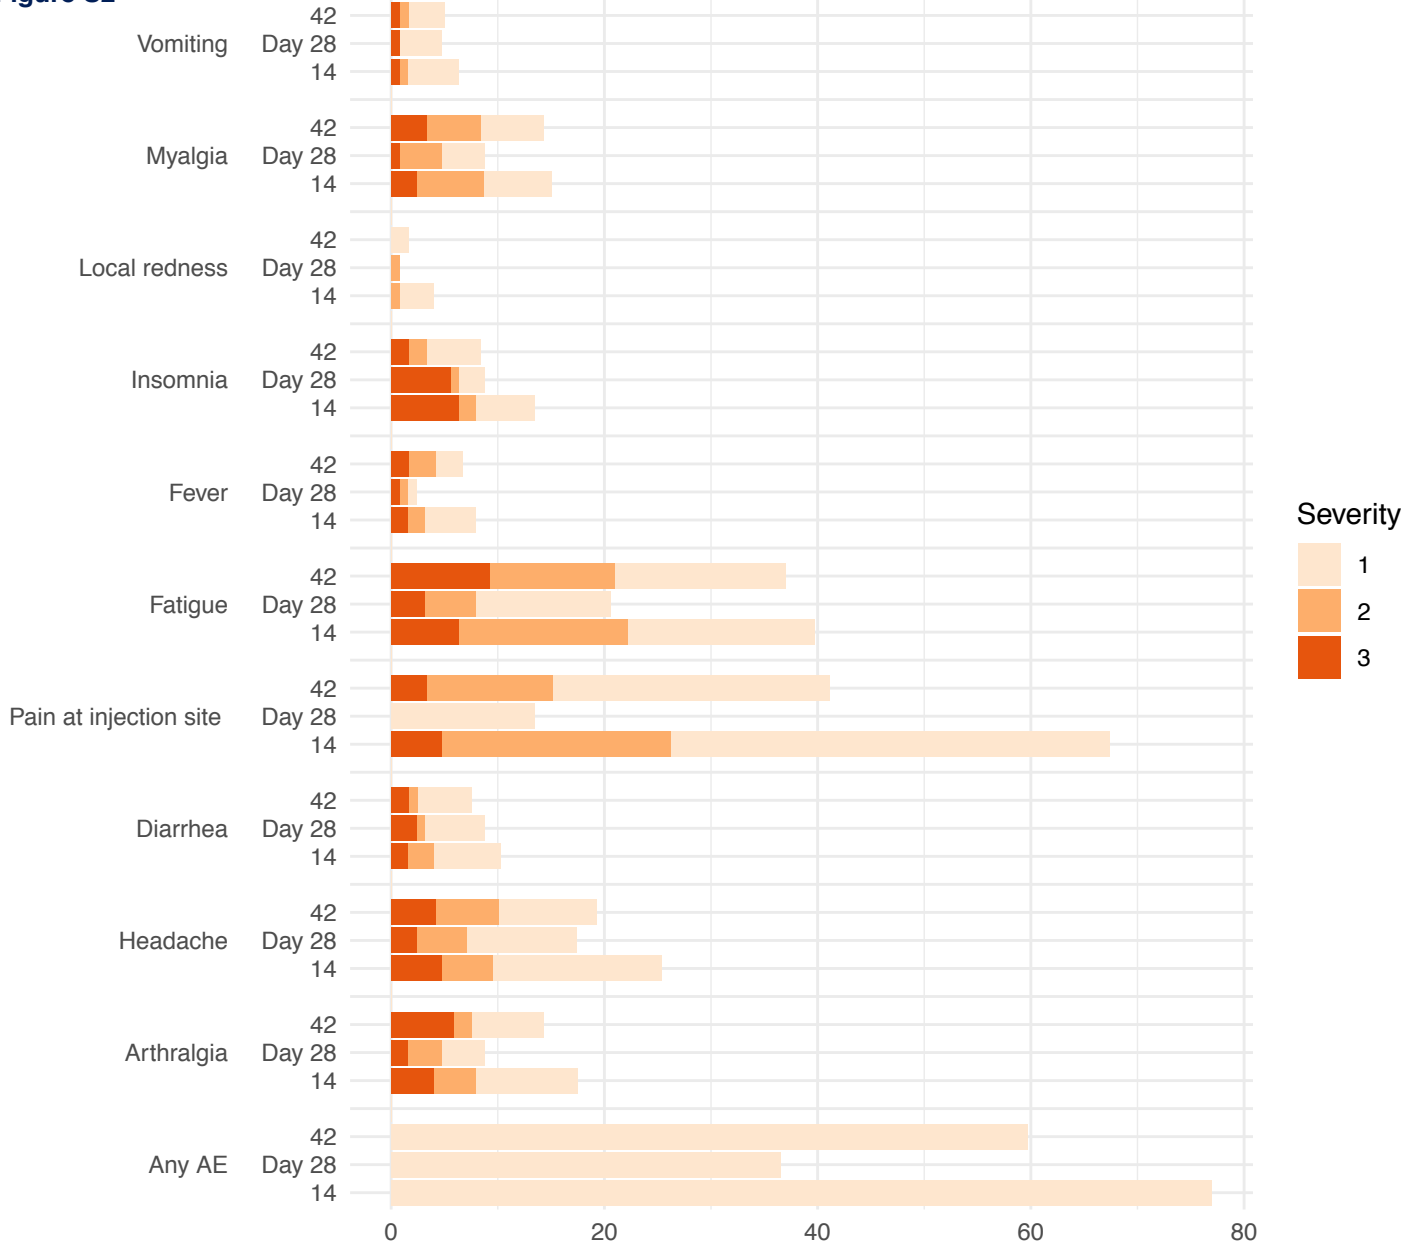

Supplement: Supplementary file [file media-3.pdf]
